# Supplementary material for: Viral vector-mediated reprogramming of the fibroblastic tumor stroma sustains curative melanoma treatment
Source: PubMed Central journal article supplement (PMC8342618; doi:10.1038/s41467-021-25057-w), 2021-08-05
Supplement: 41467_2021_25057_MOESM1_ESM.pdf [file 41467_2021_25057_MOESM1_ESM.pdf]

## **Supplementary Information**

Viral vector-mediated reprogramming of the fibroblastic tumor stroma  
sustains curative melanoma treatment

Ring et al.

## Ring et al., Supplementary Figure 1

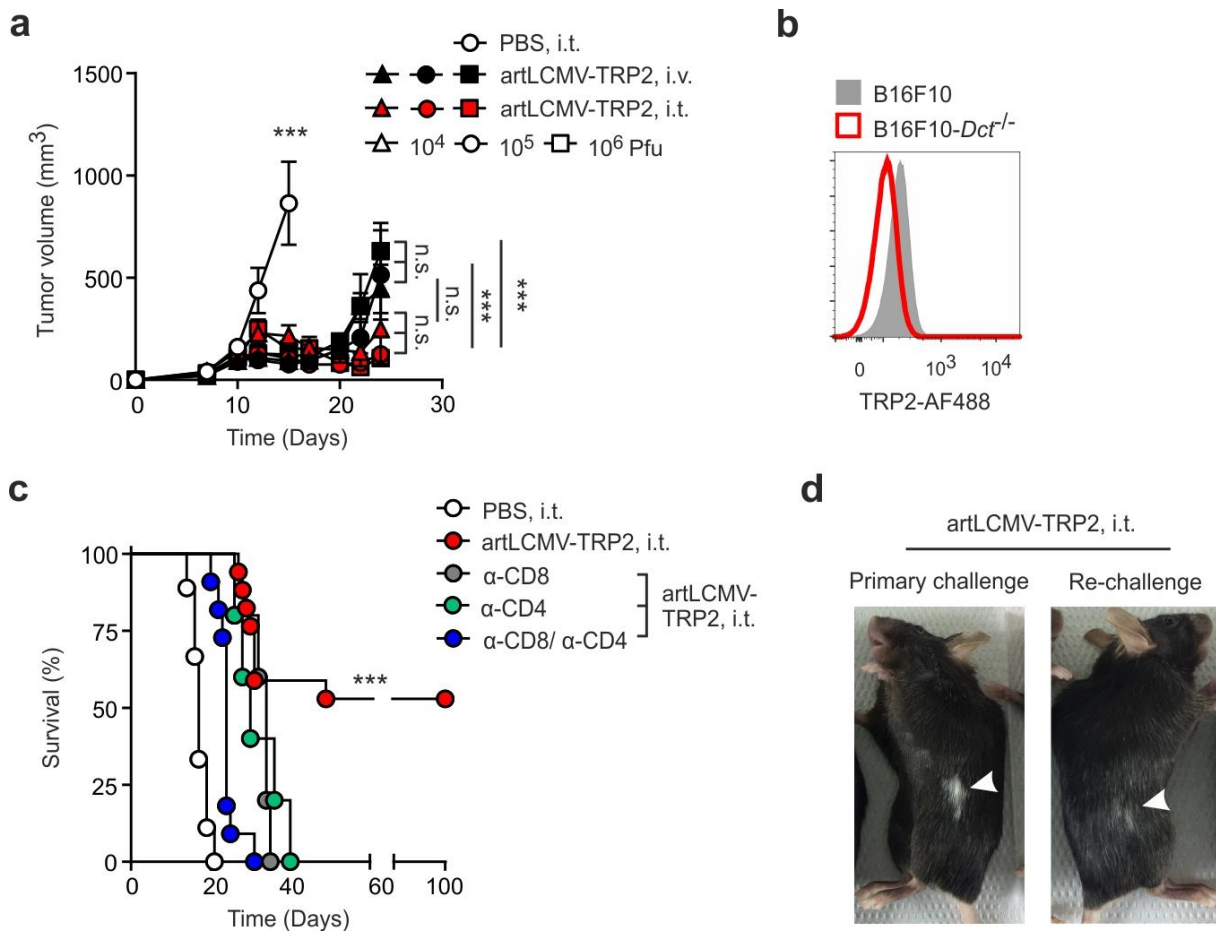

**Supplementary Figure 1. Tumor rejection after i.t. artLCMV-TRP2 treatment depends on TRP2-specific T cells.** **a**, Tumor growth kinetics of mice treated i.v. or i.t. with different doses of artLCMV-TRP2. Dots indicate mean±s.e.m. for each time point. **b**, Flow cytometric analysis of TRP2-deficient B16F10 cells (B16F10-*Dct<sup>-/-</sup>*). **c**, Survival of mice treated i.t. with artLCMV-TRP2 and injected with CD8- or CD4-depleting antibodies. **d**, Mice developed vitiligo-like fur depigmentation after i.t. treatment with artLCMV-TRP2 at the side of tumor inoculation. Data from one experiment with n=4 (PBS; 10<sup>4</sup> artLCMV-TRP2, i.v., 10<sup>5</sup> artLCMV-TRP2, i.v., 10<sup>5</sup> artLCMV-TRP2, i.t., 10<sup>6</sup> artLCMV-TRP2, i.v.), n=5 (10<sup>4</sup> artLCMV-TRP2, i.t.) and n=6 (10<sup>6</sup> artLCMV-TRP2, i.v.) mice (a). Data from one experiment with n=5 (artLCMV-TRP2, i.t.+α-CD4; artLCMV-TRP2, i.t.+α-CD8) and pooled data from two independent experiments with n=9 (PBS), n=17 (artLCMV-TRP2, i.t.) and n=11 (artLCMV-TRP2, i.t.+α-CD8/ α-CD4) mice (c). Statistical analysis was performed using two-way analysis of variance (ANOVA) with Bonferroni (a), Log-Rank Mantel-Cox test (c). \*P < 0.05; \*\*P < 0.01; \*\*\*P < 0.001. Source data and exact P values are provided in the Source data file.

## Ring et al., Supplementary Figure 2

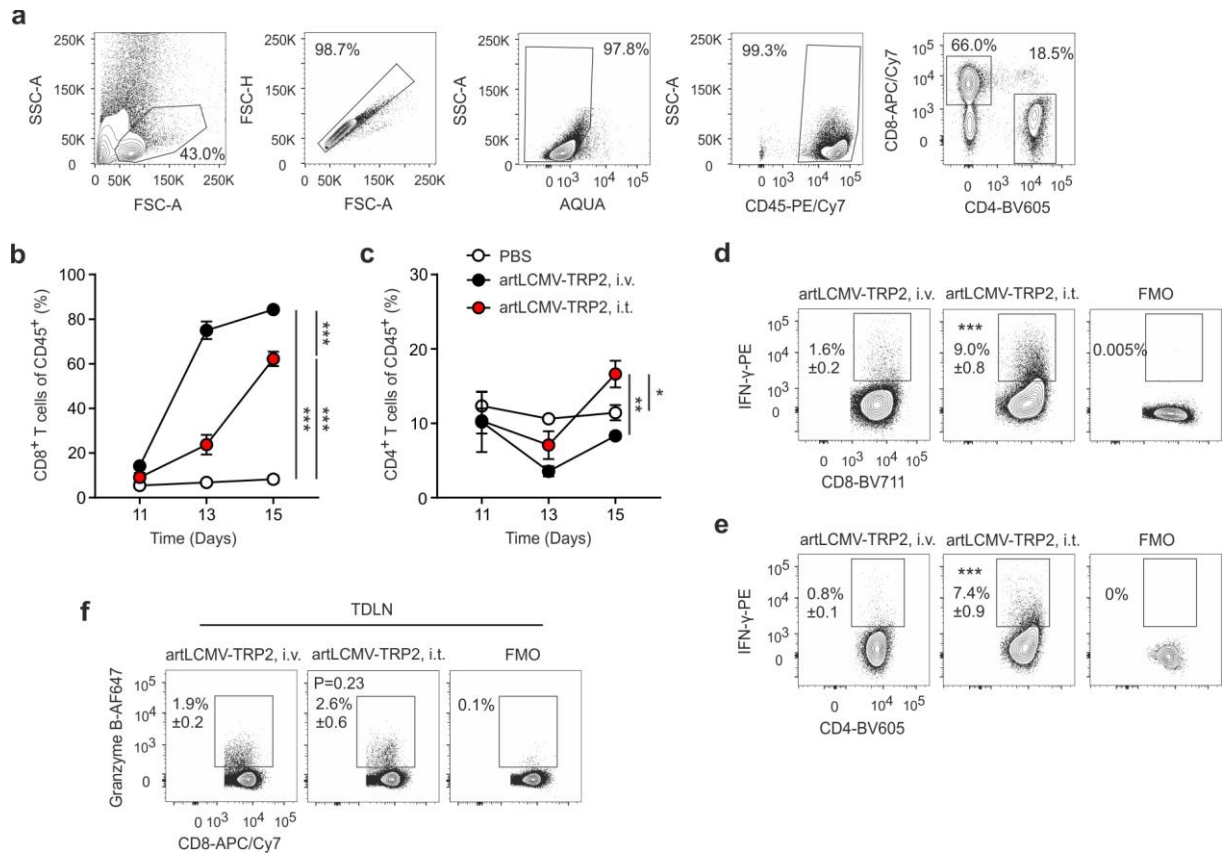

**Supplementary Figure 2. Intratumoral artLCMV-TRP2 sustains the functionality of tumor-infiltrating T cells.** B16F10-tumor bearing mice were immunized on day 7 with artLCMV-TRP2 i.v. or i.t. and tumor-infiltrating T cells were analyzed. **a**, Flow cytometry-based gating strategy for tumor-infiltrating T cell analysis used in Fig. 2a and b. **b and c**, Frequency of CD8<sup>+</sup> (b) and CD4<sup>+</sup> (c) T cells at indicated time points. Dots indicate mean ± s.e.m. for each time point. **d and e**, Flow cytometry-based gating strategy for IFN-γ expression in tumor-infiltrating CD8<sup>+</sup> (d) and CD4<sup>+</sup> (e) T cells on day 15 used in Fig. 2c. **f**, Representative plots for Granzyme B expression in CD8<sup>+</sup> T cells in the TDLN. Dots represent individual mice and lines indicate mean values. Pooled data from two independent experiments with n=4 (Day 11, PBS; Day 11, 13 and 15, artLCMV-TRP2, i.v.), n=6 (Day 11, artLCMV-TRP2, i.t.), n=7 (Day 13, PBS), n=8 (Day 15, PBS) and n=10 (Day 13, 15, artLCMV-TRP2, i.t.) mice (b, c), n=9 mice (d, f) and from one experiment with n=4 (artLCMV-TRP2, i.t.) and n=5 (artLCMV-TRP2, i.v.) mice (f). Statistical analysis was performed using one-way ANOVA with Tukey's multiple comparison test (b, c), or unpaired two-tailed Student's t test (d-f) with \*P < 0.05; \*\*P < 0.01; \*\*\*P < 0.001. Source data and exact P values are provided in the Source data file.

### Ring et al., Supplementary Figure 3

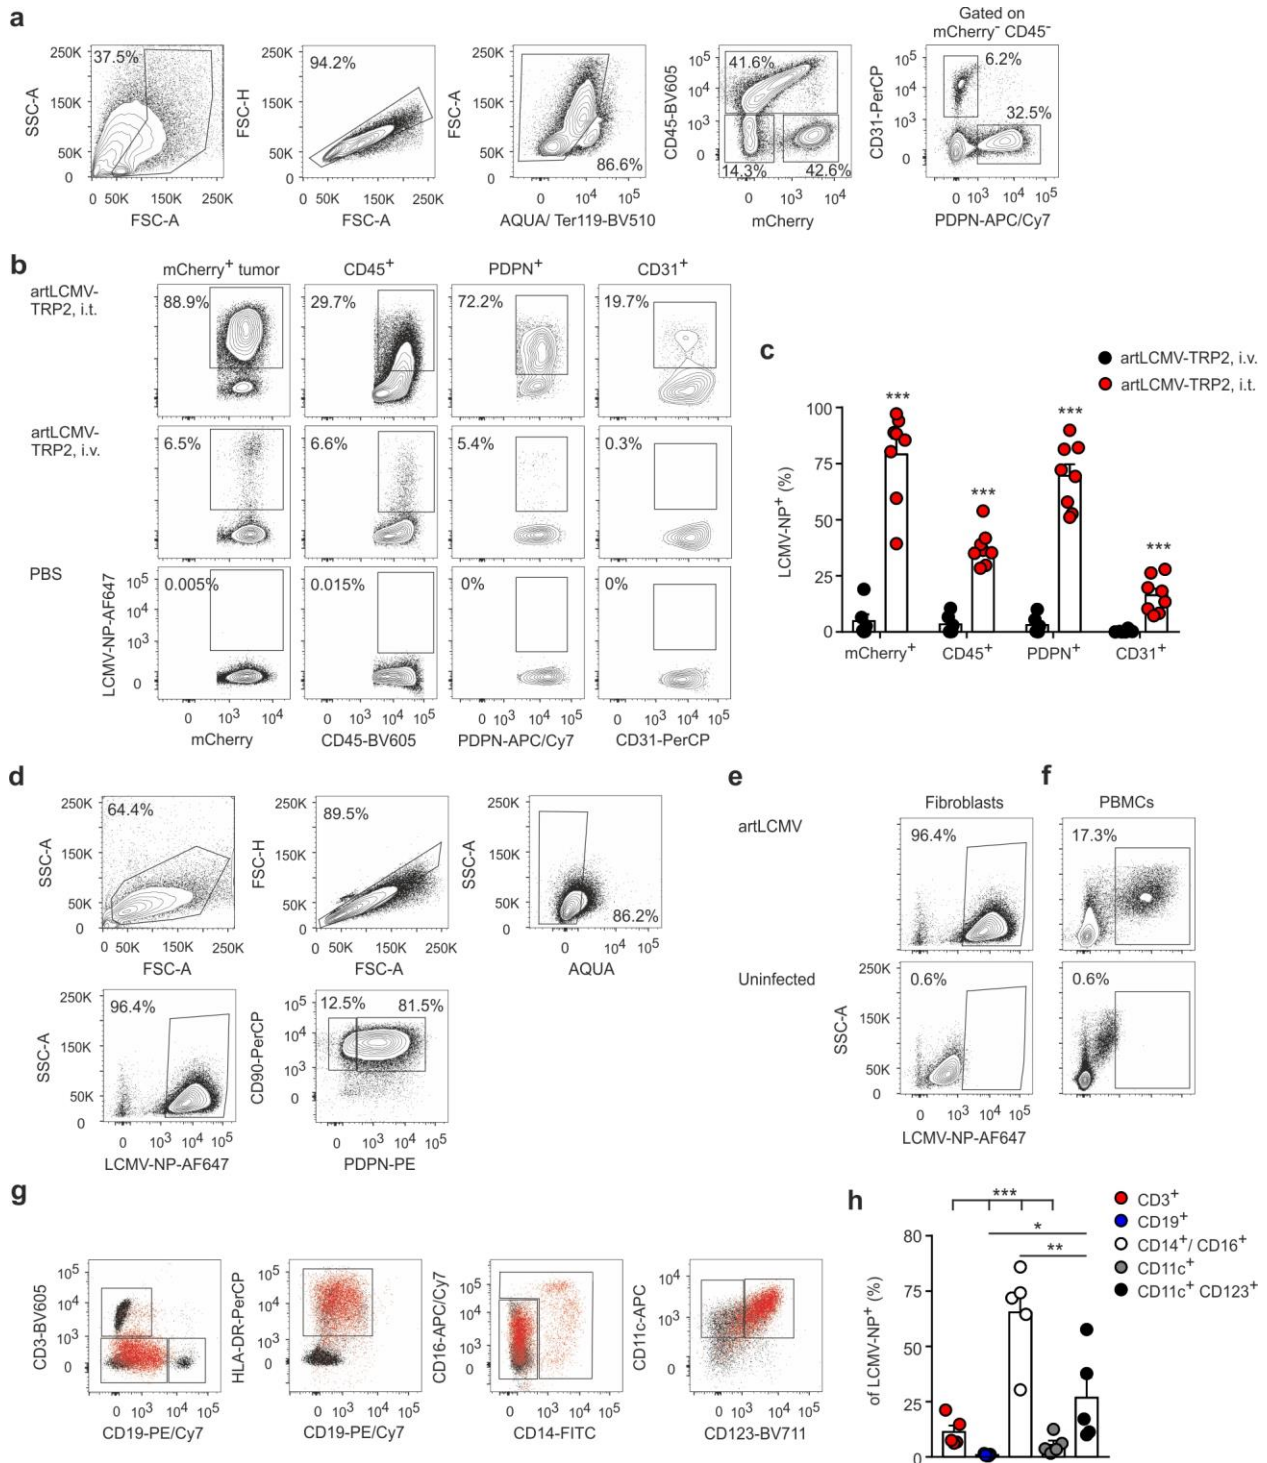

**Supplementary Figure 3. artLCMV vectors transduce human and murine FSCs.** **a**, Mice were injected with B16F10-mCherry and treated on day 7 i.t. or i.v. with artLCMV-TRP2. On day 11 tumors were harvested. Gating scheme for mCherry<sup>+</sup> tumor cells, CD45<sup>+</sup> immune cells, PDPN<sup>+</sup> FSCs and CD31<sup>+</sup> BECs isolated from the tumor used in Fig. 3c. **b-c**, Representative FACS plots (b) and frequencies (c) of LCMV-NP<sup>+</sup> cells in each cell subset in mice treated i.t. or i.v. with artLCMV-TRP2. **d-f**, Gating scheme for fibroblasts isolated from human skin and melanoma (d). Representative FACS plot for LCMV-NP staining after infection with artLCMV in (f) skin-derived fibroblasts and PBMCs used in Fig. 3f and g. **g**, Representative FACS Plot for PBMCs infected with artLCMV. Red dots indicate LCMV-NP<sup>+</sup> cells within each plot. **h**, Frequencies of CD14<sup>+</sup>/CD16<sup>+</sup> monocytes, CD11c<sup>+</sup> cDCs and CD11c<sup>+</sup>CD123<sup>+</sup> pDCs within LCMV-NP<sup>+</sup> cells. Dots indicate mean±s.e.m. Data from one experiment with n=6 (artLCMV-TRP2, i.v.) and pooled data from two independent experiments with n=8 (artLCMV-TRP2, i.t.) mice (c). Pooled data from n=5 patients (h). Statistical analysis was performed using unpaired two-tailed Student's t test (c) or one-way ANOVA with Tukey's multiple comparison test (h) with \*P < 0.05; \*\*P < 0.01; \*\*\*P < 0.001. Source data and exact P values are provided in the Source data file.

## Ring et al., Supplementary Figure 4

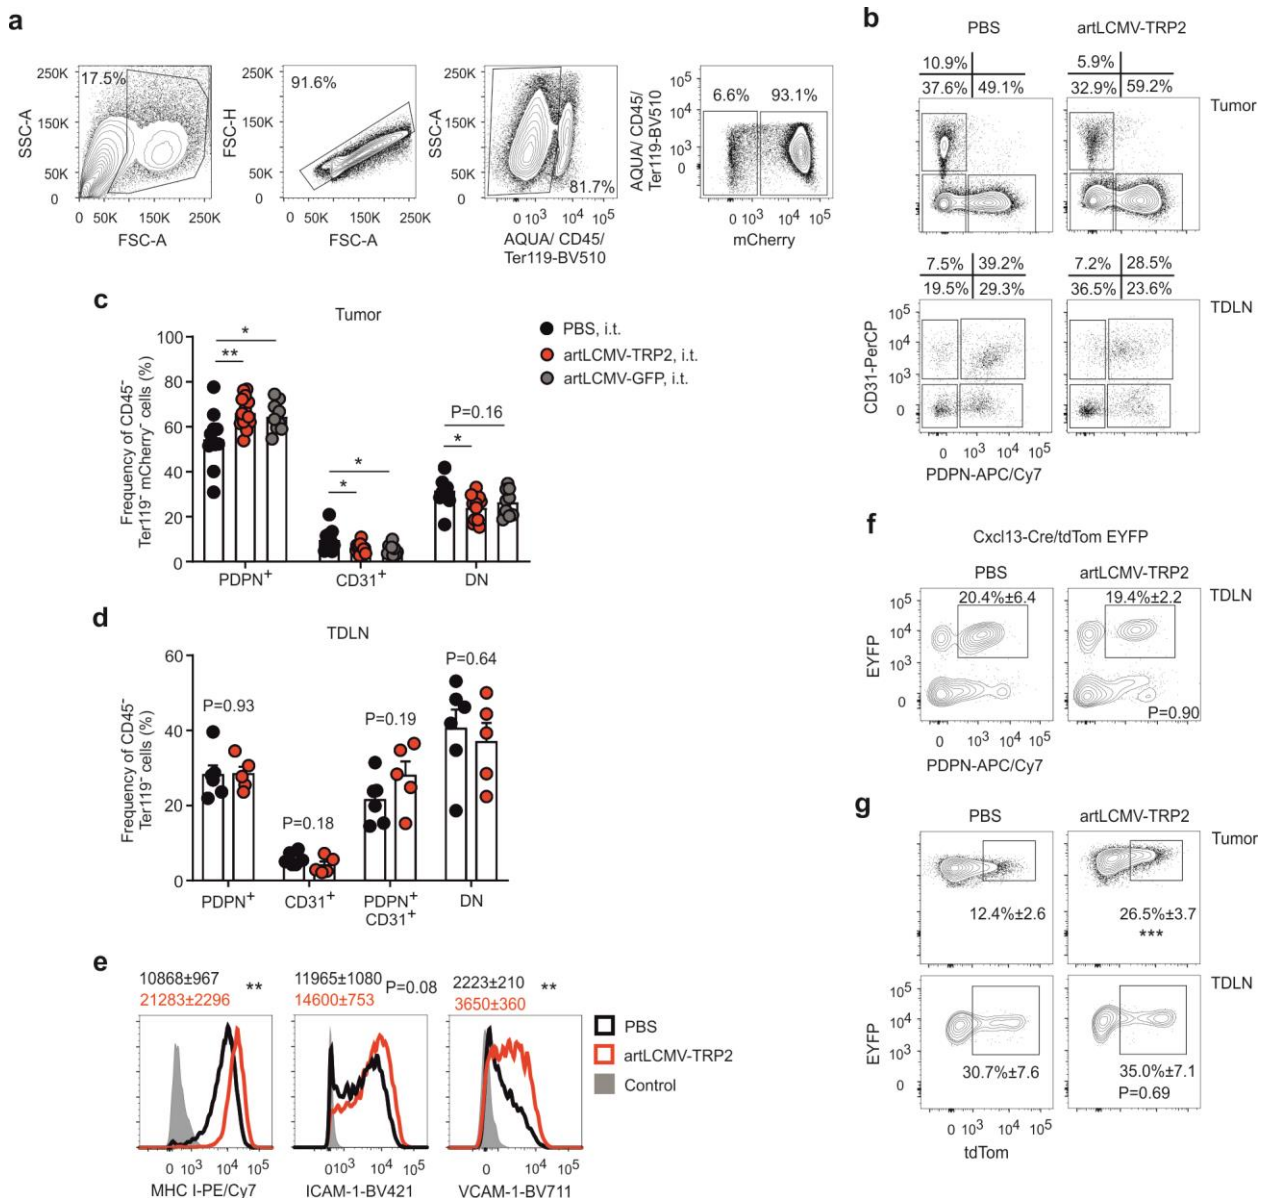

**Supplementary Figure 4. Intratumoral artLCMV injection activates PDPN<sup>+</sup> FSCs in the TME.** B16F10-mCherry-tumor bearing mice were immunized with artLCMV-TRP2 or -GFP i.t. on day 7 and FSCs in tumor and TDLN were analyzed on day 11. **a**, Flow cytometry-based gating strategy for stromal cell analysis used in Fig. 4a. **b-d**, Representative FACS plots (b) and frequencies of stromal cell subsets in the tumor (c) and the TDLNs (d). Dots show mean±s.e.m. **e**, PDPN<sup>+</sup> FSCs from the tumor were analyzed for the mean expression of the indicated marker. **f and g**, B16F10-mCherry cells were injected into Cxcl13-Cre/tdTom EYFP mice which were immunized i.t. on day 7 with artLCMV-TRP2. **f**, Representative FACS plots for EYFP<sup>+</sup> PDPN<sup>+</sup> FSCs in the TDLN. **g**, Analysis of current CXCL13 expression in EYFP<sup>+</sup> PDPN<sup>+</sup> FSCs as determined by the tdTomato reporter in the tumor as shown in Fig. 4f and in the TDLN. Values indicate mean±s.e.m. Pooled data from two independent experiments with n=11 (PBS, i.t.), n=14 (artLCMV-TRP2, i.t.) and n=9 (artLCMV-GFP, i.t.) mice (c); n=6 (PBS, i.t.) and n=5 (artLCMV-TRP2, i.t.) mice (d); n=7 (PBS) and n=6 (artLCMV-TRP2) mice (e); n=4 to 7 (PBS) and n=5 to 7 (artLCMV-TRP2, i.t.) mice (f, g). Statistical analysis was performed using unpaired two-tailed Student's t test (c, d, and e-g) with \*P < 0.05; \*\*P < 0.01; \*\*\*P < 0.001. Source data and exact P values are provided in the Source data file.

# Ring et al., Supplementary Figure 5

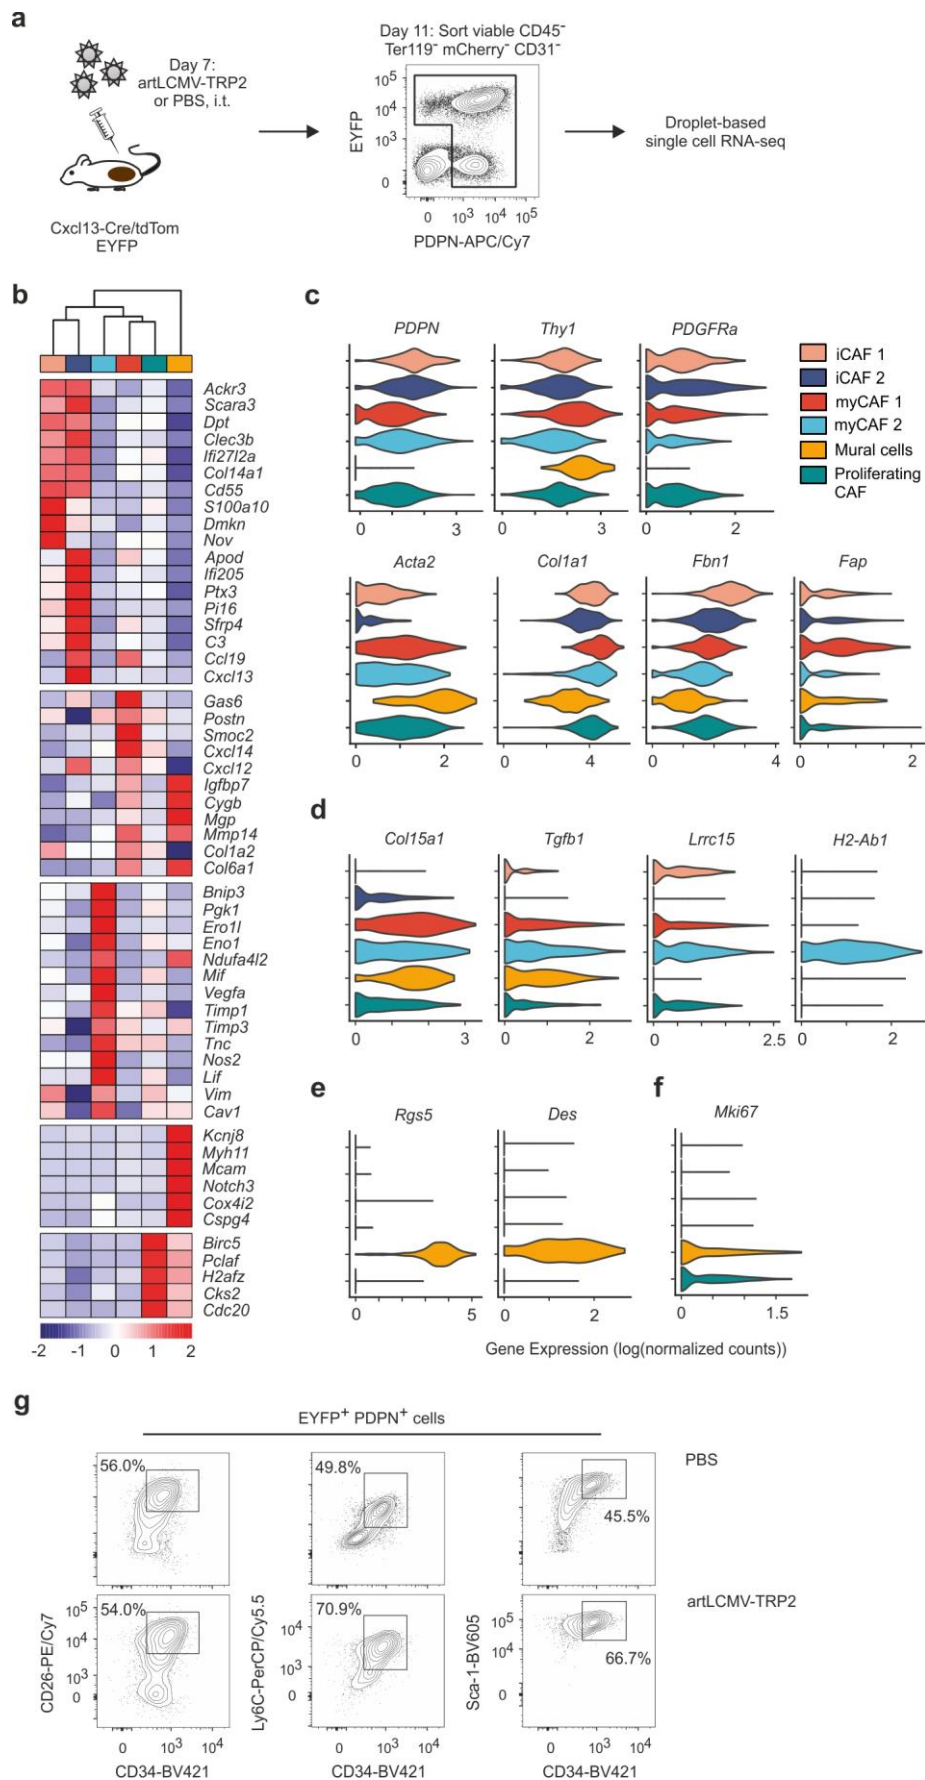

**Supplementary Figure 5. Molecular landscape of tumor-associated EYFP<sup>+</sup> FSCs.** **a**, EYFP<sup>+</sup> or PDPN<sup>+</sup> FSCs were sorted from B16F10-mCherry tumors on day 11 following i.t. artLCMV-TRP2 or PBS application. **b**, Hierarchical clustering of averaged expression of cluster specific marker genes for tumor FSC clusters in merged PBS and artLCMV-TRP2. **c-f**, Violin plots showing gene expression for Pan-CAF marker genes (c), myCAF marker genes (d), mural cells (e) and proliferating FSCs (f). **g**, Representative flow cytometric plots of iCAF-specific marker CD26<sup>+</sup> CD34<sup>+</sup>, Ly6C<sup>+</sup> CD34<sup>+</sup> and Sca-1<sup>+</sup> CD34<sup>+</sup> cell populations within the EYFP<sup>+</sup> PDPN<sup>+</sup> cells used in Fig. 5d. Source data and exact P values are provided in the Source data file.



# Ring et al., Supplementary Figure 6

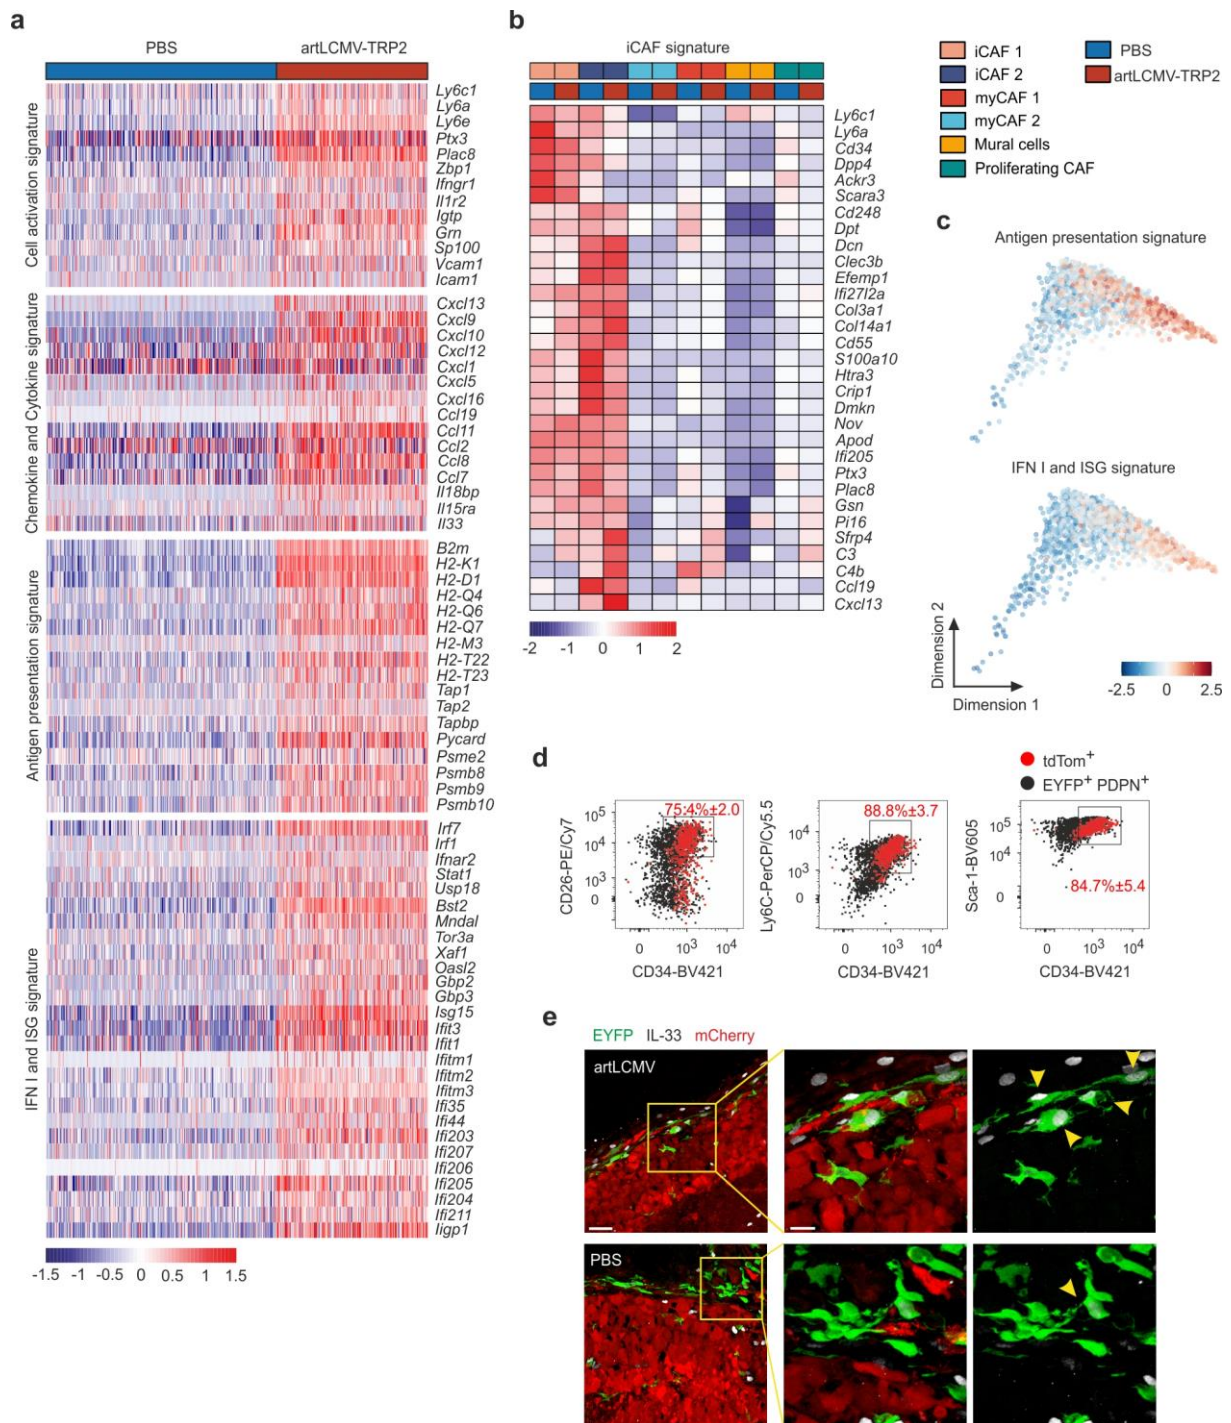

**Supplementary Figure 6. Intratumoral artLCMV-TRP2 activates *Cxcl13*-expressing iCAF2 cluster with an inflammatory gene signature. a,** DE gene analysis of iCAF1 and iCAF2 following i.t. artLCMV-TRP2 vs PBS control treatment. Heatmaps for selected DE genes which were assigned to distinct immune-stimulating pathways. **b,** Heatmaps displaying iCAF signature genes across all six identified CAF clusters in EYFP<sup>+</sup> FSCs merged from artLCMV and PBS-treated mice. **c,** Diffusion maps of EYFP<sup>+</sup> tumor FSCs with trajectories constructed based on differential genes analysis in clusters iCAF1 and iCAF2 between PBS and artLCMV condition. Diffusions maps showing antigen presentation and type I IFN and interferon-stimulating gene (IFN I and ISG) signatures. **d,** Flow cytometric analysis for tdTomato<sup>+</sup> cells showing current CXCL13 protein expression. Gates display CD26<sup>+</sup> CD34<sup>+</sup>, Ly6C<sup>+</sup> CD34<sup>+</sup> and Sca-1<sup>+</sup> CD34<sup>+</sup> cell populations gated on EYFP<sup>+</sup> PDPN<sup>+</sup> cells. Values indicate mean±s.e.m. Pooled data from two independent experiments with n=6 mice (d). **e,** Representative confocal microscopy staining for IL-33 expression within EYFP<sup>+</sup> cells from n=3 (PBS) and n=4 (artLCMV) mice. Arrowheads indicate IL-33<sup>+</sup> EYFP<sup>+</sup> cells. Scale bar 40 μm (overview), 5 μm (boxed area). Source data and exact P values are provided in the Source data file.

Ring et al., Supplementary Figure 7

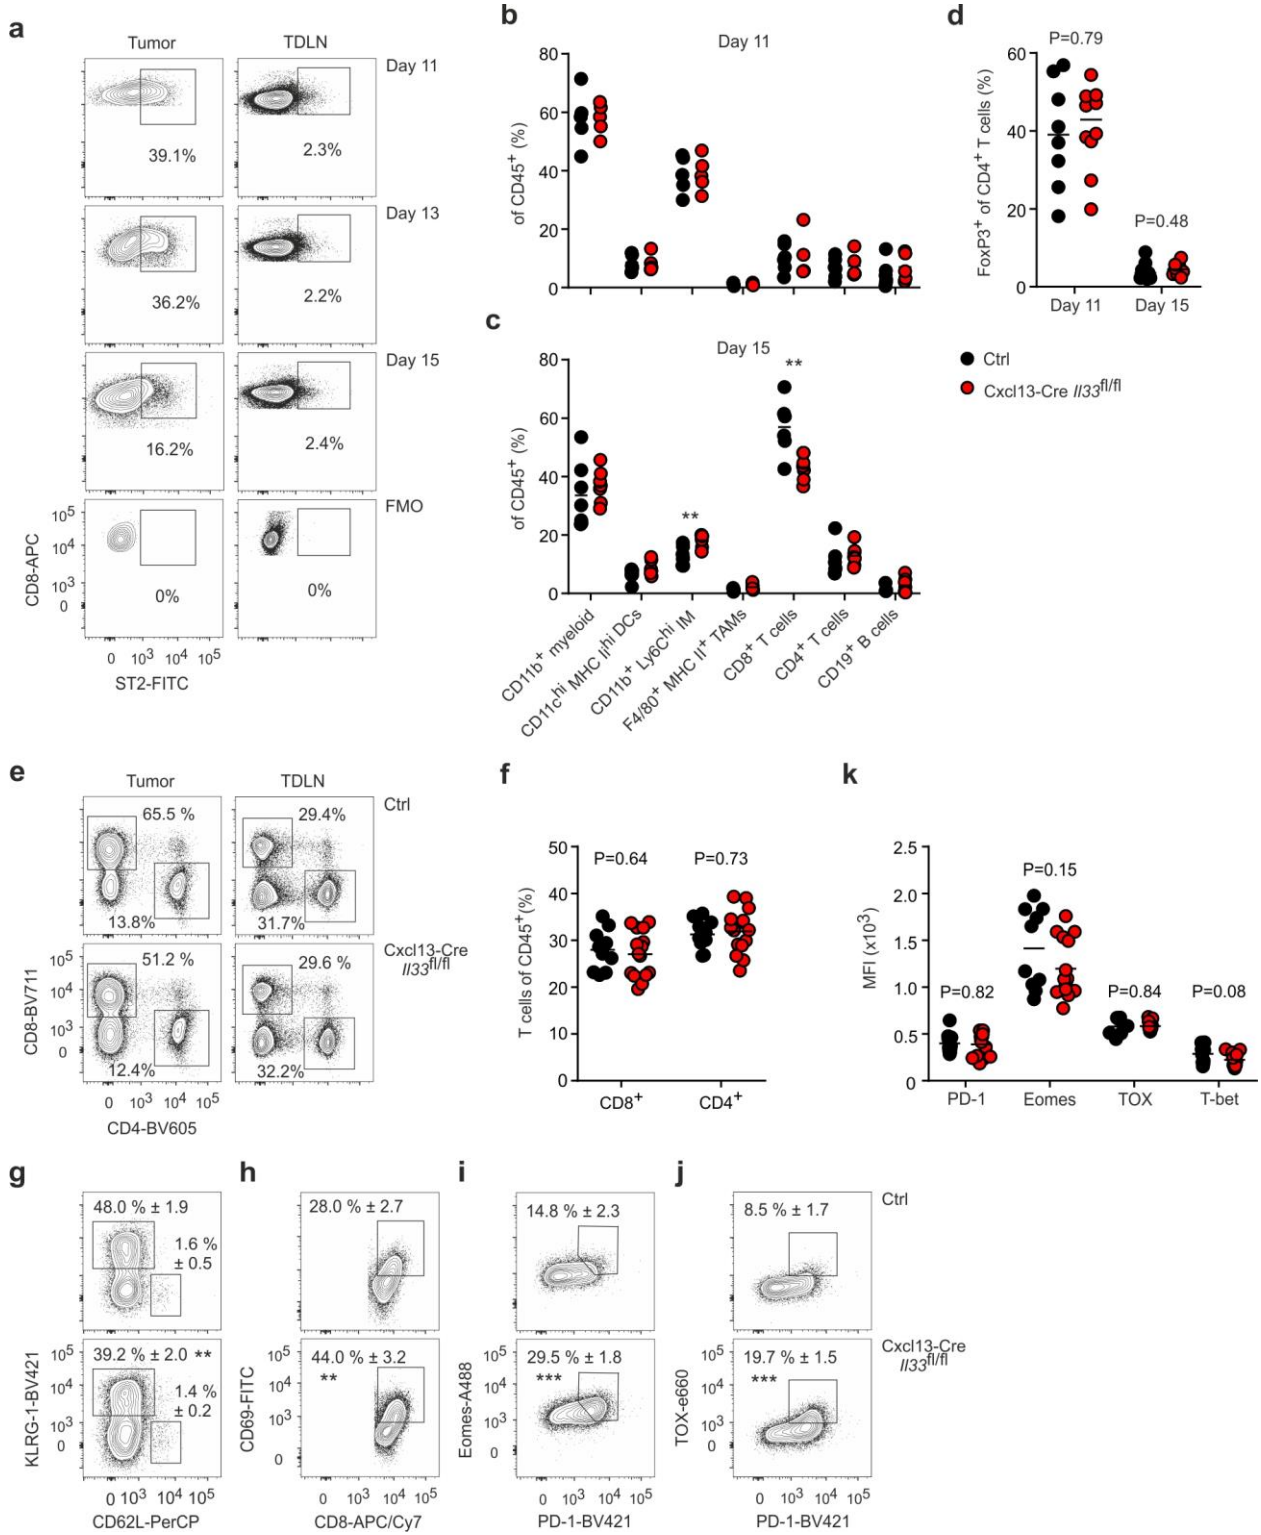

**Supplementary Figure 7. Tumor FSC-derived IL-33 prevents exhaustion in tumor-infiltrating CD8<sup>+</sup> T cells.** **a**, Mice were inoculated s.c. with B16F10 melanoma cells and treated on day 7 i.t. with artLCMV-TRP2. Representative FACS plots for ST2 staining on CD8<sup>+</sup> T cells in the tumor and TDLN at indicated time points as shown in Fig. 6a. **b-d**, Abundance of immune cell populations (b and c) and FoxP3<sup>+</sup> CD4<sup>+</sup> regulatory T cells (d) in the tumor on day 11 and day 15 in Cxcl13-Cre *Il33*<sup>fl/fl</sup> and Cre-negative littermate control (Ctrl) mice. **e and f**, Representative FACS plots of CD8<sup>+</sup> and CD4<sup>+</sup> T cells on day 15 in the tumor as quantified in Fig. 6d and the TDLN in Cxcl13-Cre *Il33*<sup>fl/fl</sup> and Ctrl mice. **f**, Pooled data showing frequency of CD8<sup>+</sup> and CD4<sup>+</sup> T cells in the TDLN. **g-j**, Representative FACS plots of KLRG1<sup>+</sup> CD62L<sup>-</sup> (g), CD69<sup>+</sup> (h), PD-1<sup>hi</sup> Eomes<sup>hi</sup> (i) and PD-1<sup>hi</sup> TOX<sup>+</sup> (j) CD8<sup>+</sup> T cells in the tumor of Cxcl13-Cre *Il33*<sup>fl/fl</sup> and Ctrl mice as shown in Fig. 6d, h, i-k. **k**, Mean expression of Eomes, PD-1, TOX and T-bet on CD8<sup>+</sup> T cells in the TDLN. Dots represent individual mice and lines indicate mean values. Pooled data from two independent experiments with n=6 (Day 11, Ctrl) and n=5 (Day 11, Cxcl13-Cre *Il33*<sup>fl/fl</sup>) mice (b); n=7 (Day 11, Ctrl and Cxcl13-Cre *Il33*<sup>fl/fl</sup>) mice (c); n=7 (TOX, Ctrl) and n=11 (TOX, Cxcl13-Cre *Il33*<sup>fl/fl</sup>) mice (k). Pooled data from three independent experiments with n=8 (Day 11, Ctrl), n=9 (Day 15, Ctrl) and n=10 (Day 11 and Day 15, Cxcl13-Cre *Il33*<sup>fl/fl</sup>) mice (d); n=10 (Ctrl) and n=15 (Cxcl13-Cre *Il33*<sup>fl/fl</sup>) mice (f); n=10 (PD-1, Eomes, T-bet, Ctrl) and n=15 mice (PD-1, Eomes, T-bet, Cxcl13-Cre *Il33*<sup>fl/fl</sup>) mice (k). Statistical analysis was performed using unpaired two-tailed Student's t test (b-d, f-k) with \*P < 0.05; \*\*P < 0.01; \*\*\*P < 0.001. Source data and exact P values are provided in the Source data file.

## Ring et al., Supplementary Figure 8

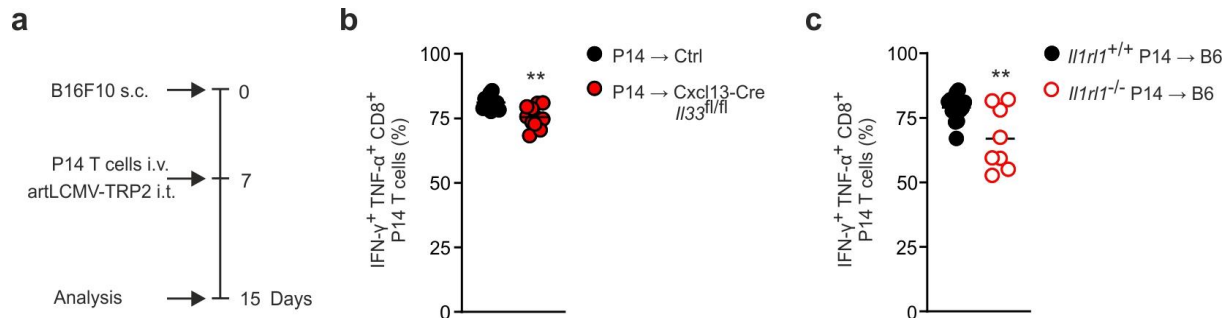

**Supplementary Figure 8. Tumor FSC-derived IL-33 prevents exhaustion in tumor-infiltrating CD8<sup>+</sup> T cells.** **a**, Mice were inoculated s.c. with B16F10 and CD45.1<sup>+</sup> P14 T cells (T cell receptor transgenic CD8<sup>+</sup> T cells specific for the LCMV epitope GP<sub>33-41</sub>) were transferred i.v. into recipient mice on day 7. Recipient mice were subsequently treated i.t. with artLCMV-TRP2 and cytokine-expressing intratumoral CD8<sup>+</sup> P14 T cells were analyzed on day 15. **b**, Frequency of IFN- $\gamma$ <sup>+</sup> TNF- $\alpha$ <sup>+</sup> CD8<sup>+</sup> P14 T cells transferred into Cxcl13-Cre *Il33*<sup>fl/fl</sup> and Cre-negative littermate control (Ctrl) mice. **c**, Frequency of cytokine<sup>+</sup> *Il1rl1* (ST2)-proficient or -deficient P14 T cells transferred into WT recipients. Dots represent individual mice and lines indicate mean values. Pooled data from three (b) or two (c) independent experiments with n=11 (Ctrl and Cxcl13-Cre *Il33*<sup>fl/fl</sup>) mice (b); n=8 (*Il1rl1*<sup>-/-</sup> P14 → B6) and n=15 (*Il1rl1*<sup>+/+</sup> P14 → B6) mice (c). Statistical analysis was performed using unpaired two-tailed Student's t-test (b, c) with \*P < 0.05; \*\*P < 0.01; \*\*\*P < 0.001. Source data and exact P values are provided in the Source data file.

## Ring et al., Supplementary Figure 9

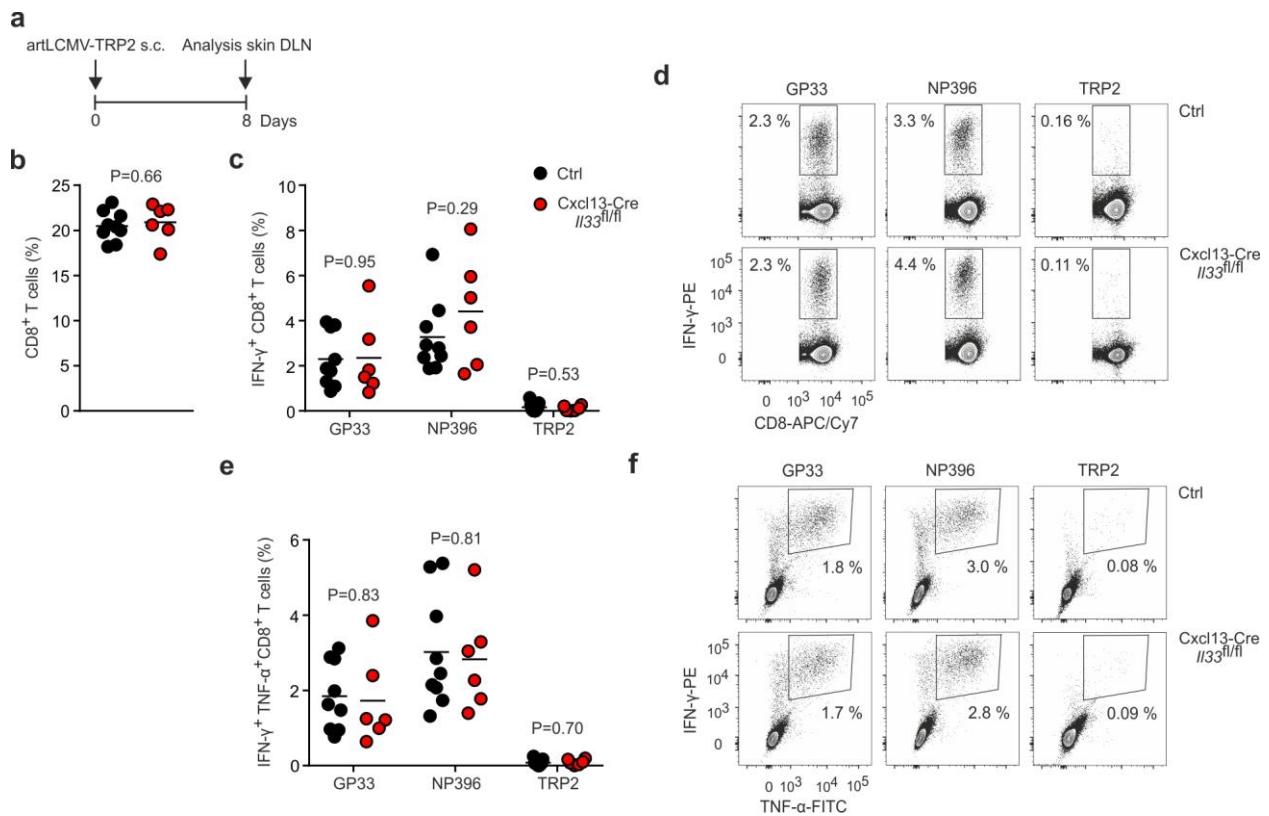

**Supplementary Figure 9. FSC-specific IL-33 ablation does not impede CD8<sup>+</sup> T cell responses after s.c. artLCMV-TRP2 immunization.** **a**, Cxc13-Cre *I133<sup>fl/fl</sup>* or Cre-negative littermate control (Ctrl) mice were immunized s.c. with artLCMV-TRP2. CD8<sup>+</sup> T cell responses were analyzed in the skin draining lymph node (SDLN) on day 8 post immunization. **b**, Frequency of CD8<sup>+</sup> T cell in the SDLN. **c-f**, Flow cytometric analysis of IFN- $\gamma$ <sup>+</sup> (c) and IFN- $\gamma$ <sup>+</sup> TNF- $\alpha$ <sup>+</sup> (e) CD8<sup>+</sup> T cells after *ex vivo* stimulation with the LCMV-specific peptides GP33 and NP396 or the TRP2 peptide. Representative plots are shown for IFN- $\gamma$ <sup>+</sup> (d) and IFN- $\gamma$ <sup>+</sup> TNF- $\alpha$ <sup>+</sup> (f) CD8<sup>+</sup> T cells. Dots represent individual mice and lines indicate mean values. Pooled data from two independent experiments with n=6 (Ctrl) and n=9 (Cxc13-Cre *I133<sup>fl/fl</sup>*) mice. Statistical analysis was performed using unpaired two-tailed Student's t-test (b, c, e) with \*P < 0.05; \*\*P < 0.01; \*\*\*P < 0.001. Source data are provided in the Source data file.

**Ring et al., Supplementary Table 1. Antibodies for flow cytometry.**

| Antibody                                      | Clone       | Conjugate                     | Source, Cat no                    | Dilution |
|-----------------------------------------------|-------------|-------------------------------|-----------------------------------|----------|
| <b>Mouse:</b>                                 |             |                               |                                   |          |
| CD106 (VCAM-1)                                | 429         | BV711                         | BD Biosciences                    | 1:100    |
| CD11b                                         | M1/70       | APC/Cy7                       | BioLegend                         | 1:200    |
| CD11c                                         | N418        | APC/Cy7, PE/Cy7               | BioLegend                         | 1:200    |
| CD19                                          | eBio1D3     | PE/Cy7                        | eBioscience                       | 1:100    |
| CD279 (PD-1)                                  | J43         | BV421                         | BioLegend                         | 1:100    |
| CD26                                          | H194-112    | PE/Cy7                        | BioLegend                         | 1:200    |
| CD31                                          | 390         | PerCP/Cy5, PE/Cy7             | BioLegend                         | 1:100    |
| CD34                                          | RAM34       | BV421                         | BioLegend                         | 1:100    |
| CD4                                           | RM4-5       | BV605                         | BioLegend                         | 1:100    |
| CD45                                          | 30-F11      | PerCP, PE/Cy7                 | BioLegend                         | 1:100    |
| CD45.1                                        | A20         | PE/Cy7                        | BioLegend                         | 1:100    |
| CD45.2                                        | 104         | BV510, BV605                  | BioLegend                         | 1:100    |
| CD54 (ICAM-1)                                 | 3E2         | BV421                         | BD Biosciences                    | 1:100    |
| CD62L                                         | MEL-14      | PerCP/Cy5.5                   | BioLegend                         | 1:100    |
| CD69                                          | H1.2F3      | FITC                          | BioLegend                         | 1:100    |
| CD8a                                          | 53-6.7      | APC, APC/Cy7, BV786,<br>BV711 | BioLegend                         | 1:100    |
| Eomes                                         | DAN11MAG    | AF488                         | eBioscience                       | 1:100    |
| F4/80                                         | BM8         | AF647                         | BioLegend                         | 1:100    |
| FoxP3                                         | FJK-165     | PE                            | eBioscience                       | 1:100    |
| Granzyme B                                    | GB11        | AF647                         | BioLegend                         | 1:100    |
| H-2D <sup>b</sup> / H-2K <sup>b</sup> (MHC I) | 28-8-6      | PE/Cy7                        | BioLegend                         | 1:100    |
| I-A/ I-E                                      | M5/114.15.2 | AF700                         | BioLegend                         | 1:200    |
| IFN- $\gamma$                                 | XMG1.2      | PE                            | BioLegend                         | 1:50     |
| KLRG1                                         | 2F1         | BV421                         | BioLegend                         | 1:100    |
| LCMV-NP                                       | VL-4        | A546/ AF647                   | BioXCell, in<br>house conjugation | 1:100    |
| Ly6C                                          | HK1.4       | PerCP                         | BioLegend                         | 1:100    |
| Ly6G                                          | 1A8         | PE                            | BioLegend                         | 1:400    |
| PDPN                                          | 8.1.1       | APC, APC/Cy7                  | BioLegend                         | 1:100    |
| Sca-1 (Ly6A/E)                                | D7          | BV605                         | BioLegend                         | 1:400    |
| ST2 (Il1r1l)                                  | DJ8         | FITC                          | MD Bioproducts                    | 1:100    |
| T-bet                                         | 4B10        | PE/Cy7                        | BioLegend                         | 1:100    |
| Ter119                                        | Ter-119     | BV510, PE/Cy7                 | BioLegend                         | 1:100    |
| TNF- $\alpha$                                 | MP6-XT22    | FITC                          | BioLegend                         | 1:50     |
| TOX                                           | TXRX10      | eFluor660                     | eBioscience                       | 1:100    |
| V $\alpha$ 2                                  | B20.1       | APC                           | BD Biosciences                    | 1:100    |
| V $\beta$ 8.1/ V $\beta$ 8.2                  | MR5-2       | PE                            | BioLegend                         | 1:100    |
| <b>Human:</b>                                 |             |                               |                                   |          |
| CD90 (Thy1)                                   | 5E10        | PerCP                         | BioLegend                         | 1:100    |
| PDPN                                          | NZ-1.3      | PE                            | eBioscience                       | 1:100    |
| CD19                                          | HIB19       | PE/Cy7                        | BioLegend                         | 1:100    |
| CD3                                           | OKT3        | BV605                         | BioLegend                         | 1:100    |
| HLA-DR                                        | L243        | PerCP/Cy5.5                   | BioLegend                         | 1:100    |
| CD14                                          | HCD14       | FITC                          | BioLegend                         | 1:100    |
| CD16                                          | 3G8         | APC/Cy7                       | BioLegend                         | 1:100    |
| CD11c                                         | Bu15        | APC                           | BioLegend                         | 1:100    |
| CD123                                         | 9F5         | BV711                         | BD Biosciences                    | 1:200    |
